# Supplementary material for: Efficacy of Colchicine in the Treatment of COVID-19 Patients: A Systematic Review and Meta-Analysis
Source: MDPI journal article supplement (doi:10.3390/jcm11092615), 2022-05-06

## **Efficacy of colchicine in the treatment of COVID-19 patients: a systematic review and meta-analysis**

### **Supplementary contents**

- **Supplementary Table S1:** Search strategy for each engine.
- **Supplementary Table S2:** Ongoing randomized controlled trials.
- **Supplementary Table S3:** GRADE summary of findings table.
- **Supplementary Figure S1:** Risk of bias assessment of included trials.
- **Supplementary Figure S2:** Sensitivity analyses of the effects of colchicine vs standard of care on mortality.

**Supplementary Table S1:** Search strategy for each engine.

| Engine | Search strategy                                                                                                                                                                                                                                                                                                                                                                                                                                                                                                                                                                                                                                                                                                                                                                                                                                                                                                                                                                                                                                                                                                                                                                                                                                                                                                                                                                                                                                                                                                                                                                                                                                                                                                                                                                                                                                                                                                                                                                                                                                                                                                                                                                                                                                                                                                                                                                                                                                                                                                                                                                                                                                                                                                                                                                                                                                                                                                                                                                                                                                                                                                                                                                                                                                                                                                                                                                                                                                                                                                                                                                                                                                                                                                                                                                                                                                     | Results |
|--------|-----------------------------------------------------------------------------------------------------------------------------------------------------------------------------------------------------------------------------------------------------------------------------------------------------------------------------------------------------------------------------------------------------------------------------------------------------------------------------------------------------------------------------------------------------------------------------------------------------------------------------------------------------------------------------------------------------------------------------------------------------------------------------------------------------------------------------------------------------------------------------------------------------------------------------------------------------------------------------------------------------------------------------------------------------------------------------------------------------------------------------------------------------------------------------------------------------------------------------------------------------------------------------------------------------------------------------------------------------------------------------------------------------------------------------------------------------------------------------------------------------------------------------------------------------------------------------------------------------------------------------------------------------------------------------------------------------------------------------------------------------------------------------------------------------------------------------------------------------------------------------------------------------------------------------------------------------------------------------------------------------------------------------------------------------------------------------------------------------------------------------------------------------------------------------------------------------------------------------------------------------------------------------------------------------------------------------------------------------------------------------------------------------------------------------------------------------------------------------------------------------------------------------------------------------------------------------------------------------------------------------------------------------------------------------------------------------------------------------------------------------------------------------------------------------------------------------------------------------------------------------------------------------------------------------------------------------------------------------------------------------------------------------------------------------------------------------------------------------------------------------------------------------------------------------------------------------------------------------------------------------------------------------------------------------------------------------------------------------------------------------------------------------------------------------------------------------------------------------------------------------------------------------------------------------------------------------------------------------------------------------------------------------------------------------------------------------------------------------------------------------------------------------------------------------------------------------------------------------|---------|
| PubMed | <p>#1: COVID-19[MH] OR COVID 19[MH] OR COVID-19 Virus Disease[MH] OR COVID 19 Virus Disease[MH] OR COVID-19 Virus Diseases[MH] OR Disease, COVID-19 Virus[MH] OR Virus Disease, COVID-19[MH] OR COVID-19 Virus Infection[MH] OR COVID 19 Virus Infection[MH] OR COVID-19 Virus Infections[MH] OR Infection, COVID-19 Virus[MH] OR Virus Infection, COVID-19[MH] OR 2019-nCoV Infection[MH] OR 2019 nCoV Infection[MH] OR 2019-nCoV Infections[MH] OR Infection, 2019-nCoV[MH] OR Coronavirus Disease-19[MH] OR Coronavirus Disease 19[MH] OR 2019 Novel Coronavirus Disease[MH] OR 2019 Novel Coronavirus Infection[MH] OR 2019-nCoV Disease[MH] OR 2019 nCoV Disease[MH] OR 2019-nCoV Diseases[MH] OR Disease, 2019-nCoV[MH] OR COVID19[MH] OR Coronavirus Disease 2019[MH] OR Disease 2019, Coronavirus[MH] OR SARS Coronavirus 2 Infection[MH] OR SARS-CoV-2 Infection[MH] OR Infection, SARS-CoV-2[MH] OR SARS CoV 2 Infection[MH] OR SARS-CoV-2 Infections[MH] OR COVID-19 Pandemic[MH] OR COVID-19 Pandemics[MH] OR Pandemic, COVID-19[MH] OR SARS-CoV-2[MH] OR Coronavirus Disease 2019 Virus[MH] OR 2019 Novel Coronavirus[MH] OR 2019 Novel Coronaviruses[MH] OR Coronavirus, 2019 Novel[MH] OR Novel Coronavirus, 2019[MH] OR Wuhan Seafood Market Pneumonia Virus[MH] OR SARS-CoV-2 Virus[MH] OR SARS CoV 2 Virus[MH] OR SARS-CoV-2 Viruses[MH] OR Virus, SARS-CoV-2[MH] OR 2019-nCoV[MH] OR COVID-19 Virus[MH] OR COVID 19 Virus[MH] OR COVID-19 Viruses[MH] OR Virus, COVID-19[MH] OR Wuhan Coronavirus[MH] OR Coronavirus, Wuhan[MH] OR SARS Coronavirus 2[MH] OR Coronavirus 2, SARS[MH] OR Severe Acute Respiratory Syndrome Coronavirus 2[MH] OR "COVID-19"[TIAB] OR "COVID 19"[TIAB] OR "COVID-19 Virus Disease"[TIAB] OR "COVID 19 Virus Disease"[TIAB] OR "COVID-19 Virus Infection"[TIAB] OR "COVID 19 Virus Infection"[TIAB] OR "2019-nCoV Infection"[TIAB] OR "2019 nCoV Infection"[TIAB] OR "Coronavirus Disease-19"[TIAB] OR "Coronavirus Disease 19"[TIAB] OR "2019 Novel Coronavirus Disease"[TIAB] OR "2019 Novel Coronavirus Infection"[TIAB] OR "2019-nCoV Disease"[TIAB] OR "2019 nCoV Disease"[TIAB] OR COVID19[TIAB] OR "Coronavirus Disease 2019"[TIAB] OR "SARS Coronavirus 2 Infection"[TIAB] OR "SARS-CoV-2 Infection"[TIAB] OR "SARS CoV 2 Infection"[TIAB] OR "COVID-19 Pandemic"[TIAB] OR "COVID 19 Pandemic"[TIAB] OR "COVID 2019"[TIAB] OR "Sars Coronavirus 2 infection"[TIAB] OR "sarscov2 disease"[TIAB] OR "sarscov2 infection"[TIAB] OR "sars-cov2 infection"[TIAB] OR "sars-cov2 disease"[TIAB] OR "wuhan coronavirus disease"[TIAB] OR "wuhan coronavirus infection"[TIAB] OR "ncov 2019 disease"[TIAB] OR "ncov 2019 infection"[TIAB] OR "novel coronavirus 2019 disease"[TIAB] OR "novel coronavirus 2019 infection"[TIAB] OR "novel coronavirus disease* 2019"[TIAB] OR "novel coronavirus infection* 2019"[TIAB] OR SARS-CoV-2[TIAB] OR "Coronavirus Disease 2019 Virus"[TIAB] OR "2019 Novel Coronavirus"[TIAB] OR "Wuhan Seafood Market Pneumonia Virus"[TIAB] OR "SARS-CoV-2 Virus"[TIAB] OR "SARS CoV 2 Virus"[TIAB] OR 2019-nCoV[TIAB] OR "COVID-19 Virus"[TIAB] OR "COVID 19 Virus"[TIAB] OR "Wuhan Coronavirus"[TIAB] OR "SARS Coronavirus 2"[TIAB] OR "Severe Acute Respiratory Syndrome Coronavirus 2"[TIAB] OR "sars-related coronavirus"[TIAB] OR "sars-like cov"[TIAB] OR "sars-like coronavirus"[TIAB] OR "sars-related cov"[TIAB] OR "sarsr-cov"[TIAB] OR "severe acute respiratory syndrome-like coronavirus"[TIAB] OR "severe acute respiratory syndrome-related coronavirus"[TIAB] OR "sars coronavirus"[TIAB] OR hcov-sars[TIAB] OR "human sars coronavirus"[TIAB] OR "sars cov"[TIAB] OR "sars associated coronavirus"[TIAB] OR "sars virus"[TIAB] OR sars-cov[TIAB] OR "sars-associated coronavirus"[TIAB] OR "severe acute respiratory syndrome coronavirus"[TIAB] OR</p> | 107     |

|        |                                                                                                                                                                                                                                                                                                                                                                                                                                                                                                                                                                                                                                                                                                                                                                                                                                                                                                                                                                                                                                                                                                                                                                                                                                                                                                                                                                                                                                                                                                                                                                                                                                                                                                                                                                                                                                                                                                                                                                                                                                                                                                                                                                                                                                                                                                                                                                                                                                                                                                                                                                                                                                                                                                                                             |     |
|--------|---------------------------------------------------------------------------------------------------------------------------------------------------------------------------------------------------------------------------------------------------------------------------------------------------------------------------------------------------------------------------------------------------------------------------------------------------------------------------------------------------------------------------------------------------------------------------------------------------------------------------------------------------------------------------------------------------------------------------------------------------------------------------------------------------------------------------------------------------------------------------------------------------------------------------------------------------------------------------------------------------------------------------------------------------------------------------------------------------------------------------------------------------------------------------------------------------------------------------------------------------------------------------------------------------------------------------------------------------------------------------------------------------------------------------------------------------------------------------------------------------------------------------------------------------------------------------------------------------------------------------------------------------------------------------------------------------------------------------------------------------------------------------------------------------------------------------------------------------------------------------------------------------------------------------------------------------------------------------------------------------------------------------------------------------------------------------------------------------------------------------------------------------------------------------------------------------------------------------------------------------------------------------------------------------------------------------------------------------------------------------------------------------------------------------------------------------------------------------------------------------------------------------------------------------------------------------------------------------------------------------------------------------------------------------------------------------------------------------------------------|-----|
|        | <p>“severe acute respiratory syndrome virus”[TIAB] OR “Coronavirus disease*”[TIAB] OR “severe acute respiratory virus coronavirus 2”[TIAB] OR “coronavirus pandemic”[TIAB] OR Coronavirus*[TIAB] OR “SARS-COV2 pandemic”[TIAB] OR “SARS-COV-2 pandemic”[TIAB] OR “SARS COV2 pandemic”[TIAB] OR “COVID-19”[OT] OR “COVID 19”[OT] OR “COVID-19 Virus Disease*”[OT] OR “COVID 19 Virus Disease*”[OT] OR “COVID-19 Virus Infection*”[OT] OR “COVID 19 Virus Infection*”[OT] OR “2019-nCoV Infection*”[OT] OR “2019 nCoV Infection*”[OT] OR “Coronavirus Disease-19”[OT] OR “Coronavirus Disease 19”[OT] OR “2019 Novel Coronavirus Disease”[OT] OR “2019 Novel Coronavirus Infection”[OT] OR “2019-nCoV Disease*”[OT] OR “2019 nCoV Disease*”[OT] OR COVID19[OT] OR “Coronavirus Disease 2019”[OT] OR “SARS Coronavirus 2 Infection”[OT] OR “SARS-CoV-2 Infection*”[OT] OR “SARS CoV 2 Infection*”[OT] OR “COVID-19 Pandemic*”[OT] OR “COVID 19 Pandemic*”[OT] OR “COVID 2019”[OT] OR “Sars Coronavirus 2 infection*”[OT] OR “sarscov2 disease*”[OT] OR “sarscov2 infection*”[OT] OR “sars-cov2 infection*”[OT] OR “sars-cov2 disease*”[OT] OR “wuhan coronavirus disease*”[OT] OR “wuhan coronavirus infection*”[OT] OR “ncov 2019 disease*”[OT] OR “ncov 2019 infection*”[OT] OR “novel coronavirus 2019 disease*”[OT] OR “novel coronavirus 2019 infection*”[OT] OR “novel coronavirus disease* 2019”[OT] OR “novel coronavirus infection* 2019”[OT] OR SARS-CoV-2[OT] OR “Coronavirus Disease 2019 Virus”[OT] OR “2019 Novel Coronavirus*”[OT] OR “Wuhan Seafood Market Pneumonia Virus”[OT] OR “SARS-CoV-2 Virus*”[OT] OR “SARS CoV 2 Virus*”[OT] OR 2019-nCoV[OT] OR “COVID-19 Virus*”[OT] OR “COVID 19 Virus*”[OT] OR “Wuhan Coronavirus”[OT] OR “SARS Coronavirus 2”[OT] OR “Severe Acute Respiratory Syndrome Coronavirus 2”[OT] OR “sars-related coronavirus”[OT] OR “sars-like cov”[OT] OR “sars-like coronavirus”[OT] OR “sars-related cov”[OT] OR “sars-cov”[OT] OR “severe acute respiratory syndrome-like coronavirus”[OT] OR “severe acute respiratory syndrome-related coronavirus”[OT] OR “sars coronavirus”[OT] OR hcov-sars[OT] OR “human sars coronavirus”[OT] OR “sars cov”[OT] OR “sars associated coronavirus”[OT] OR “sars virus”[OT] OR sars-cov[OT] OR “sars-associated coronavirus”[OT] OR “severe acute respiratory syndrome coronavirus”[OT] OR “severe acute respiratory syndrome virus”[OT] OR “Coronavirus disease*”[OT] OR “severe acute respiratory virus coronavirus 2”[OT] OR “coronavirus pandemic”[OT] OR Coronavirus*[OT] OR “SARS-COV2 pandemic”[OT] OR “SARS-COV-2 pandemic”[OT] OR “SARS COV2 pandemic”[OT]</p> <p>#2: Colchicine[MH] OR Colchicin*[TIAB] OR Colchicin*[OT]</p> <p>#3: #1 AND #2</p> |     |
| Scopus | <p>#1: TITLE-ABS-KEY(“COVID-19” OR “COVID 19” OR “COVID-19 Virus Disease*” OR “COVID 19 Virus Disease*” OR “COVID-19 Virus Infection*” OR “COVID 19 Virus Infection*” OR “2019-nCoV Infection*” OR “2019 nCoV Infection*” OR “Coronavirus Disease-19” OR “Coronavirus Disease 19” OR “2019 Novel Coronavirus Disease” OR “2019 Novel Coronavirus Infection” OR “2019-nCoV Disease*” OR “2019 nCoV Disease*” OR COVID19 OR “Coronavirus Disease 2019” OR “SARS Coronavirus 2 Infection” OR “SARS-CoV-2 Infection*” OR “SARS CoV 2 Infection*” OR “COVID-19 Pandemic*” OR “COVID 19 Pandemic*” OR “COVID 2019” OR “Sars Coronavirus 2 infection*” OR “sarscov2 disease*” OR “sarscov2 infection*” OR “sars-cov2 infection*” OR “sars-cov2 disease*” OR “wuhan coronavirus disease*” OR “wuhan coronavirus infection*” OR “ncov 2019 disease*” OR “ncov 2019 infection*” OR “novel coronavirus 2019 disease*” OR “novel coronavirus 2019 infection*” OR “novel coronavirus disease* 2019” OR “novel coronavirus infection* 2019” OR SARS-CoV-2 OR “Coronavirus Disease 2019 Virus” OR “2019 Novel Coronavirus*” OR “Wuhan Seafood Market Pneumonia</p>                                                                                                                                                                                                                                                                                                                                                                                                                                                                                                                                                                                                                                                                                                                                                                                                                                                                                                                                                                                                                                                                                                                                                                                                                                                                                                                                                                                                                                                                                                                                                                                         | 217 |

|                     |                                                                                                                                                                                                                                                                                                                                                                                                                                                                                                                                                                                                                                                                                                                                                                                                                                                                                                                                                                                                                                                                                                                                                                                                                                                                                                                                                                                                                                                                                                                                                                                                                                                                                                                                                                                                                                                                                                                                                                                                                                                                                                                        |     |
|---------------------|------------------------------------------------------------------------------------------------------------------------------------------------------------------------------------------------------------------------------------------------------------------------------------------------------------------------------------------------------------------------------------------------------------------------------------------------------------------------------------------------------------------------------------------------------------------------------------------------------------------------------------------------------------------------------------------------------------------------------------------------------------------------------------------------------------------------------------------------------------------------------------------------------------------------------------------------------------------------------------------------------------------------------------------------------------------------------------------------------------------------------------------------------------------------------------------------------------------------------------------------------------------------------------------------------------------------------------------------------------------------------------------------------------------------------------------------------------------------------------------------------------------------------------------------------------------------------------------------------------------------------------------------------------------------------------------------------------------------------------------------------------------------------------------------------------------------------------------------------------------------------------------------------------------------------------------------------------------------------------------------------------------------------------------------------------------------------------------------------------------------|-----|
|                     | <p>Virus" OR "SARS-CoV-2 Virus*" OR "SARS CoV 2 Virus*" OR 2019-nCoV OR "COVID-19 Virus*" OR "COVID 19 Virus*" OR "Wuhan Coronavirus" OR "SARS Coronavirus 2" OR "Severe Acute Respiratory Syndrome Coronavirus 2" OR "sars-related coronavirus" OR "sars-like cov" OR "sars-like coronavirus" OR "sars-related cov" OR "sarsr-cov" OR "severe acute respiratory syndrome-like coronavirus" OR "severe acute respiratory syndrome-related coronavirus" OR "sars coronavirus" OR hcov-sars OR "human sars coronavirus" OR "sars cov" OR "sars associated coronavirus" OR "sars virus" OR sars-cov OR "sars-associated coronavirus" OR "severe acute respiratory syndrome coronavirus" OR "severe acute respiratory syndrome virus" OR "Coronavirus disease*" OR "severe acute respiratory virus coronavirus 2" OR "coronavirus pandemic" OR Coronavirus* OR "SARS-COV2 pandemic" OR "SARS-COV-2 pandemic" OR "SARS COV2 pandemic")</p> <p>#2: TITLE-ABS-KEY(Colchicin*)</p> <p>#3: #1 AND #2</p>                                                                                                                                                                                                                                                                                                                                                                                                                                                                                                                                                                                                                                                                                                                                                                                                                                                                                                                                                                                                                                                                                                                        |     |
| Wos/Core Collection | <p>#1: TS=("COVID-19" OR "COVID 19" OR "COVID-19 Virus Disease*" OR "COVID 19 Virus Disease*" OR "COVID-19 Virus Infection*" OR "COVID 19 Virus Infection*" OR "2019-nCoV Infection*" OR "2019 nCoV Infection*" OR "Coronavirus Disease-19" OR "Coronavirus Disease 19" OR "2019 Novel Coronavirus Disease" OR "2019 Novel Coronavirus Infection" OR "2019-nCoV Disease*" OR "2019 nCoV Disease*" OR COVID19 OR "Coronavirus Disease 2019" OR "SARS Coronavirus 2 Infection" OR "SARS-CoV-2 Infection*" OR "SARS CoV 2 Infection*" OR "COVID-19 Pandemic*" OR "COVID 19 Pandemic*" OR "COVID 2019" OR "Sars Coronavirus 2 infection*" OR "sarscov2 disease*" OR "sarscov2 infection*" OR "sars-cov2 infection*" OR "sars-cov2 disease*" OR "wuhan coronavirus disease*" OR "wuhan coronavirus infection*" OR "ncov 2019 disease*" OR "ncov 2019 infection*" OR "novel coronavirus 2019 disease*" OR "novel coronavirus 2019 infection*" OR "novel coronavirus disease* 2019" OR "novel coronavirus infection* 2019" OR SARS-CoV-2 OR "Coronavirus Disease 2019 Virus" OR "2019 Novel Coronavirus*" OR "Wuhan Seafood Market Pneumonia Virus" OR "SARS-CoV-2 Virus*" OR "SARS CoV 2 Virus*" OR 2019-nCoV OR "COVID-19 Virus*" OR "COVID 19 Virus*" OR "Wuhan Coronavirus" OR "SARS Coronavirus 2" OR "Severe Acute Respiratory Syndrome Coronavirus 2" OR "sars-related coronavirus" OR "sars-like cov" OR "sars-like coronavirus" OR "sars-related cov" OR "sarsr-cov" OR "severe acute respiratory syndrome-like coronavirus" OR "severe acute respiratory syndrome-related coronavirus" OR "sars coronavirus" OR hcov-sars OR "human sars coronavirus" OR "sars cov" OR "sars associated coronavirus" OR "sars virus" OR sars-cov OR "sars-associated coronavirus" OR "severe acute respiratory syndrome coronavirus" OR "severe acute respiratory syndrome virus" OR "Coronavirus disease*" OR "severe acute respiratory virus coronavirus 2" OR "coronavirus pandemic" OR Coronavirus* OR "SARS-COV2 pandemic" OR "SARS-COV-2 pandemic" OR "SARS COV2 pandemic")</p> <p>#2: TS=colchicin*</p> <p>#3: #1 AND #2</p> | 74  |
| Ovid/Medline        | <p>#1: COVID-19.mp. or COVID-19/<br/> #2: COVID-19/ or COVID.mp.<br/> #3: #1 OR #2<br/> #4: Colchicine.mp. or Colchicine/<br/> #5: #3 AND #4</p>                                                                                                                                                                                                                                                                                                                                                                                                                                                                                                                                                                                                                                                                                                                                                                                                                                                                                                                                                                                                                                                                                                                                                                                                                                                                                                                                                                                                                                                                                                                                                                                                                                                                                                                                                                                                                                                                                                                                                                       | 103 |

|                                |                                                                                                                                                                                                                                                                                                                                                                                                                                                                                                                                                                                                                                                                                                                                                                                                                                                                                                                                                                                                                                                                                                                                                                                                                                                                                                                                                                                                                                                                                                                                                                                                                                                                                                                                                                                                                                                                                                                                                                                                                                                                                                                                                                                                                                                                                                                                                                                                                              |            |
|--------------------------------|------------------------------------------------------------------------------------------------------------------------------------------------------------------------------------------------------------------------------------------------------------------------------------------------------------------------------------------------------------------------------------------------------------------------------------------------------------------------------------------------------------------------------------------------------------------------------------------------------------------------------------------------------------------------------------------------------------------------------------------------------------------------------------------------------------------------------------------------------------------------------------------------------------------------------------------------------------------------------------------------------------------------------------------------------------------------------------------------------------------------------------------------------------------------------------------------------------------------------------------------------------------------------------------------------------------------------------------------------------------------------------------------------------------------------------------------------------------------------------------------------------------------------------------------------------------------------------------------------------------------------------------------------------------------------------------------------------------------------------------------------------------------------------------------------------------------------------------------------------------------------------------------------------------------------------------------------------------------------------------------------------------------------------------------------------------------------------------------------------------------------------------------------------------------------------------------------------------------------------------------------------------------------------------------------------------------------------------------------------------------------------------------------------------------------|------------|
| <p><b>Embase</b></p>           | <p><b>#1:</b> 'coronavirus disease 2019'/exp OR 'coronavirus disease 2019':ti,ab OR '2019 novel coronavirus disease':tn,ti,ab OR '2019 novel coronavirus infection':tn,ti,ab OR '2019-ncov disease':tn,ti,ab OR '2019-ncov infection':tn,ti,ab OR 'covid':tn,ti,ab OR 'covid 19':tn,ti,ab OR 'covid 2019':tn,ti,ab OR 'covid-19':tn,ti,ab OR 'covid19':tn,ti,ab OR 'sars coronavirus 2 infection':tn,ti,ab OR 'sars-cov-2 disease':tn,ti,ab OR 'sars-cov-2 infection':tn,ti,ab OR 'sars-cov2 disease':tn,ti,ab OR 'sars-cov2 infection':tn,ti,ab OR 'sarscov2 disease':tn,ti,ab OR 'sarscov2 infection':tn,ti,ab OR 'wuhan coronavirus disease':tn,ti,ab OR 'wuhan coronavirus infection':tn,ti,ab OR 'coronavirus disease 2019':tn,ti,ab OR 'ncov 2019 disease':tn,ti,ab OR 'ncov 2019 infection':tn,ti,ab OR 'novel coronavirus 2019 disease':tn,ti,ab OR 'novel coronavirus 2019 infection':tn,ti,ab OR 'novel coronavirus disease 2019':tn,ti,ab OR 'novel coronavirus infection 2019':tn,ti,ab OR 'coronavirus disease 2019'/exp/'adverse device effect'</p> <p><b>#2:</b> 'colchicine'/exp OR colchicine:ti,ab OR '7 acetamido 6, 7 dihydro 1, 2, 3, 10 tetramethoxybenzo [a] heptalen 9 (5h) one':tn,ti,ab OR 'aqua colchin':tn,ti,ab OR 'colchichine':tn,ti,ab OR 'colchicin':tn,ti,ab OR 'colchicina':tn,ti,ab OR 'colchicine':tn,ti,ab OR 'colchicine capsules':tn,ti,ab OR 'colchicine houde':tn,ti,ab OR 'colchicine sodium':tn,ti,ab OR 'colchicum-dispert':tn,ti,ab OR 'colchily':tn,ti,ab OR 'colchimedio':tn,ti,ab OR 'colchiquim':tn,ti,ab OR 'colchisol':tn,ti,ab OR 'colchysat':tn,ti,ab OR 'colcine':tn,ti,ab OR 'colcrys':tn,ti,ab OR 'colctab':tn,ti,ab OR 'colgout':tn,ti,ab OR 'colrefuz':tn,ti,ab OR 'gloperba':tn,ti,ab OR 'goutichine':tn,ti,ab OR 'goutnil':tn,ti,ab OR 'kolkicin':tn,ti,ab OR 'kolkisin':tn,ti,ab OR 'mitigare':tn,ti,ab OR 'mpc 004':tn,ti,ab OR 'mpc004':tn,ti,ab OR 'n (1, 2, 3, 10 tetramethoxy 9 oxo 5, 6, 7, 9 tetrahydrobenzo [a] heptalen 7 yl) acetamide':tn,ti,ab OR 'n (1, 2, 3, 10 tetramethoxy 9 oxo 6, 7 dihydro 5h benzo [a] heptalen 7 yl) acetamide':tn,ti,ab OR 'n (5, 6, 7, 9 tetrahydro 1, 2, 3, 10 tetramethoxy 9 oxobenzo [a] heptalen 7 yl) acetamide':tn,ti,ab OR 'n acetyl trimethylcolchicinic acid methyl ether':tn,ti,ab OR 'nsc 757':tn,ti,ab OR 'tolchicine':tn,ti,ab OR 'colchicine'/exp/'adverse device effect'</p> <p><b>#3:</b> #1 AND #2</p> | <p>253</p> |
| <p><b>Cochrane CENTRAL</b></p> | <p><b>#1:</b> MeSH descriptor: [COVID-19] explode all trees</p> <p><b>#2:</b> ("COVID-19" OR "COVID 19" OR "COVID-19 Virus Disease*" OR "COVID 19 Virus Disease*" OR "COVID-19 Virus Infection*" OR "COVID 19 Virus Infection*" OR "2019 nCoV Infection*" OR "Coronavirus Disease-19" OR "Coronavirus Disease 19" OR "2019 Novel Coronavirus Disease" OR "2019 Novel Coronavirus Infection" OR "2019 nCoV Disease*" OR "COVID19" OR "Coronavirus Disease 2019" OR "SARS Coronavirus 2 Infection" OR "SARS-CoV-2 Infection*" OR "SARS CoV 2 Infection*" OR "COVID-19 Pandemic*" OR "COVID 19 Pandemic*" OR "COVID 2019" OR "Sars Coronavirus 2 infection*" OR "sarscov2 disease*" OR "sarscov2 infection*" OR "sars-cov2 infection*" OR "sars-cov2 disease*" OR "wuhan coronavirus disease*" OR "wuhan coronavirus infection*" OR "ncov 2019 disease*" OR "ncov 2019 infection*" OR "novel coronavirus 2019 disease*" OR "novel coronavirus 2019 infection*" OR "novel coronavirus disease* 2019" OR "novel coronavirus infection* 2019" OR "SARS-CoV-2" OR "Coronavirus Disease 2019 Virus" OR "2019 Novel Coronavirus*" OR "Wuhan Seafood Market Pneumonia Virus" OR "SARS-CoV-2 Virus*" OR "SARS CoV 2 Virus*" OR "COVID-19 Virus*" OR "COVID 19 Virus*" OR "Wuhan Coronavirus" OR "SARS Coronavirus 2" OR "Severe Acute Respiratory Syndrome Coronavirus 2" OR "sars-related coronavirus" OR "sars-like cov" OR "sars-like coronavirus" OR "sars-cov" OR "severe acute respiratory syndrome-like coronavirus" OR "severe acute respiratory syndrome-related coronavirus" OR "sars coronavirus" OR "hcov-sars" OR "human sars coronavirus" OR "sars cov" OR "sars associated coronavirus" OR "sars virus" OR "sars-cov" OR "sars-associated coronavirus" OR "severe acute respiratory syndrome coronavirus" OR "severe acute respiratory syndrome virus" OR "Coronavirus disease*" OR "severe acute respiratory virus coronavirus 2" OR "coronavirus</p>                                                                                                                                                                                                                                                                                                                                                                                                                                                                   | <p>43</p>  |

|  |                                                                                                                                                                                                                                                                                                                     |  |
|--|---------------------------------------------------------------------------------------------------------------------------------------------------------------------------------------------------------------------------------------------------------------------------------------------------------------------|--|
|  | <p>pandemic” OR “Coronavirus*” OR “SARS-COV2 pandemic” OR “SARS-COV-2 pandemic” OR “SARS COV2 pandemic”):ti,ab,kw</p> <p><b>#3:</b> #1 OR #2</p> <p><b>#4:</b> MeSH descriptor: [Colchicine] explode all trees</p> <p><b>#5:</b> ("colchicine"):ti,ab,kw</p> <p><b>#6:</b> #4 OR #5</p> <p><b>#7:</b> #3 AND #6</p> |  |
|--|---------------------------------------------------------------------------------------------------------------------------------------------------------------------------------------------------------------------------------------------------------------------------------------------------------------------|--|

**Supplementary Table S2:** Ongoing randomized controlled trials (as of July 30, 2021).

| <b>Trial ID</b> | <b>Trial title</b>                                                                                                                                    | <b>Experimental arm</b>                                                                                                                                            | <b>Control arm</b>                                                                                                                                                                                                               | <b>Country</b> | <b>Estimated enrollment</b> | <b>Estimated study completion date</b> |
|-----------------|-------------------------------------------------------------------------------------------------------------------------------------------------------|--------------------------------------------------------------------------------------------------------------------------------------------------------------------|----------------------------------------------------------------------------------------------------------------------------------------------------------------------------------------------------------------------------------|----------------|-----------------------------|----------------------------------------|
| NCT0437 5202    | Colchicine in COVID-19: a Pilot Study (COLVID-19)                                                                                                     | Colchicine tablets containing 1 mg, administered 0.5 mg po every 8 hours x 30 days                                                                                 | Current care                                                                                                                                                                                                                     | Italy          | 308 patients                | October 31, 2021                       |
| NCT0435 5143    | Colchicine to Reduce Cardiac Injury in COVID-19 (COLHEART-19) (COLHEART-19)                                                                           | Colchicine 0.6 mg po BID x 30 days plus current care per UCLA treating physicians                                                                                  | Current care per UCLA physicians alone                                                                                                                                                                                           | United States  | 150 patients                | April 25, 2021                         |
| NCT0436 0980    | The Effects of Standard Protocol with or Without Colchicine in Covid-19 Infection                                                                     | Colchicine Tablets 1.5 mg loading then 0.5 mg BID                                                                                                                  | Standard treatment<br>40 RT-PCR positive COVID-19 patients without hypoxemia receiving vitamin C 3grams daily, 400 mg Tiamine, Selenium, Omega-3 500 mg daily, Vit A, Vit D, Azithromycine, Ceftriaxone, Kaletra 400 BID 10 days | Iran           | 80 patients                 | November 30, 2021                      |
| NCT0475 6128    | Impact of Colchicine and Lowdose Naltrexone on COVID-19                                                                                               | Colchicine-containing treatment arm will receive colchicine 0.6 mg twice daily for up to 28 days.                                                                  | Patients in this arm will receive the investigating institution's current standard of care for patients with COVID-19.                                                                                                           | United States  | 164 patients                | December 31, 2021                      |
| NCT0449 2358    | Treatment for Moderate/Severe COVID-19 in a Fragile and Vulnerable Population, Admitted to a Geriatric Hospital Unit or in a Transicional Care Center | Prednisone 60 mg/day, in a single dose, for 3 days and Colchicine ideal dose of 0.3 mg/kg/day                                                                      | Standard treatment                                                                                                                                                                                                               | Spain          | 144 patients                | October 2021                           |
| NCT0481 8489    | Colchicine and Post-COVID-19 Pulmonary Fibrosis                                                                                                       | Colchicine 0.5 mg (2 tablets: 1 mg) twice per day as a loading dose, followed by one tablet 0.5 twice per day for three weeks in addition to the standard protocol | Local standard protocol for COVID19                                                                                                                                                                                              | Egypt          | 250 patients                | July 10, 2021                          |
| NCT0447 2611    | Colchicine/Statins for the Prevention of COVID-19 Complications (COLSTAT) Trial (COLSTAT)                                                             | Rosuvastatin 40mg daily and Colchicine 0.6mg twice for 3 days                                                                                                      | Standard of care treatment                                                                                                                                                                                                       | United States  | 466 patients                | August 1, 2021                         |

|             |                                                                                                                                                                           |                                                                                                                                                                                             |                                                                                                                                                                         |                                    |              |                   |
|-------------|---------------------------------------------------------------------------------------------------------------------------------------------------------------------------|---------------------------------------------------------------------------------------------------------------------------------------------------------------------------------------------|-------------------------------------------------------------------------------------------------------------------------------------------------------------------------|------------------------------------|--------------|-------------------|
|             |                                                                                                                                                                           | and then 0.6mg daily during hospitalization                                                                                                                                                 |                                                                                                                                                                         |                                    |              |                   |
| NCT04516941 | CorONa Virus edoxabaN ColchicinE (CONVINCE) COVID-19                                                                                                                      | Colchicine at 0.5 mg per os (PO) twice daily for the first 3 days and then once daily from randomization to day 14 (+/-3) days. Treatment could be continued to day 25 (+3/-3 days).        | No intervention                                                                                                                                                         | Belgium, Italy, Spain, Switzerland | 420 patients | June 30, 2023     |
| NCT04724629 | Survival TRial Using CytoKines in COVID-19 (STRUCK Trial)                                                                                                                 | Patients will receive study medication colchicine 0.5 mg every 8 hours for 3 days (PO), followed by 4 weeks (+/-7 days) 0.5 mg twice daily. If a dose is missed, it should not be replaced. | Standard treatment, supplementation of O2 ventilation + standard treatment of the institution, which may include Dexamethasone according to the institutional protocol. | Brazil                             | 60 patients  | July 30, 2021     |
| NCT04416334 | Preemptive therapy with colchicine in patients older than 60 years with high risk of severe pneumoniae due to coronavirus (COLCHI-COVID)                                  | Colchicine 0.5 mg orally (PO) twice daily for the first 3 days and then once daily for the last 18 days plus symptomatic treatment (paracetamol)                                            | Symptomatic treatment (paracetamol or best symptomatic treatment based on doctor recommendations)                                                                       | Spain                              | 954 patients | December 31, 2021 |
| NCT04403243 | COLchicine Versus Ruxolitinib and Secukinumab In Open Prospective Randomized Trial                                                                                        | 30 Patients with mild and severe COVID 19 Patients will get investigated therapy for ten days. Patients will be follow-up during 45 days after randomization                                | 30 patients Patients with mild and severe COVID 19 Patients will get investigated therapy for ten days. Patients will be follow-up during 45 days after randomization   | Russian Federation                 | 70 patients  | August 23, 2020   |
| NCT04322565 | Colchicine Counteracting Inflammation in COVID-19 Pneumonia (ColCOVID-19)                                                                                                 | Colchicine 1mg (or 0.5 mg in CKD)/day + standard of care for COVID-19 pneumonia                                                                                                             | Standard of care                                                                                                                                                        | Italy                              | 310 patients | December 21, 2020 |
| NCT04367168 | Colchicine Twice Daily During 10 Days as an Option for the Treatment of Symptoms Induced by Inflammation in Patients With Mild and Severe Coronavirus Disease (ColchiVID) | Colchicine 1mg, 1 ½ pill in day 1 and ½ pill BID during 10 days                                                                                                                             | Placebo, 1 ½ pill in day 1 and ½ pill BID during 10 days                                                                                                                | Mexico                             | 174 patients | April 27, 2021    |
| NCT04539873 | Impact of Colchicine in Hospitalized Colombian Patients With COVID-19 ((COLCOVID19))                                                                                      | Colchicine 1,5 orally on the first day (initially two pills of 0,5 mg and 0.5 mg at 2 hours), followed                                                                                      | Standard treatment                                                                                                                                                      | Colombia                           | 128 patients | December 15, 2021 |



|             |                                                                                                   |                                                                                                                                                                                                                                                                |                                                                                                                                                                   |                                                                                                                                                       |                |                |
|-------------|---------------------------------------------------------------------------------------------------|----------------------------------------------------------------------------------------------------------------------------------------------------------------------------------------------------------------------------------------------------------------|-------------------------------------------------------------------------------------------------------------------------------------------------------------------|-------------------------------------------------------------------------------------------------------------------------------------------------------|----------------|----------------|
|             |                                                                                                   | by 0.5 mg every 12 hours on days 2 to 7, and continuing with 0.5 mg per day until completing 14 ± 1 days                                                                                                                                                       |                                                                                                                                                                   |                                                                                                                                                       |                |                |
| NCT04363437 | Colchicine in Moderate-severe Hospitalized Patients Before ARDS to Treat COVID-19 (COMBATCOVID19) | Colchicine starting dose of 1.2 mg followed, by 0.6mg after 2 hours if they do not have significant gastrointestinal symptoms, on day 1. After that, they will take colchicine 0.6mg twice a day for 14 days or until discharged or release from the hospital. | Usual care COVID19 treatment and will not receive colchicine.                                                                                                     | United States                                                                                                                                         | 70 patients    | June 14, 2020  |
| NCT04381936 | Randomised Evaluation of COVID-19 Therapy                                                         | Colchicine<br>First (main) randomisation part A. 1 mg after randomisation followed by 500mcg 12 hours later and then 500 mcg twice daily by mouth or nasogastric tube for 10 days in total, for men ≥18 years old and women ≥55 years old only                 | Patient receives usual hospital care.                                                                                                                             | Indonesia, Nepal, United Kingdom                                                                                                                      | 45000 patients | December 2021  |
| NCT04324463 | Anti-Coronavirus Therapies to Prevent Progression of Coronavirus Disease 2019 (COVID-19) Trial    | Outpatients: 0.6 mg twice daily for 3 days, then 0.6 mg once daily for 25 days (total 28 days).<br>Inpatients: 1.2 mg followed by 0.6 mg 2 hours later, then 0.6 mg twice daily for 28 days.                                                                   | Outpatients and Inpatients: No constraints for treating physicians on the therapies within the standard of care arm. All key co-interventions will be documented. | Brazil, Canada<br>Colombia,<br>Ecuador, Egypt,<br>India, Pakistan,<br>Philippines,<br>Russian<br>Federation, Saudi<br>Arabia, United<br>Arab Emirates | 4000 patients  | April 30, 2022 |

**Supplemental Table S3:** GRADE Summary of findings of the effect of Colchicine vs. Standard of care in the treatment of COVID-19 patients.

| Certainty assessment      |                       |                           |                          |              |                           |                      | № of patients     |                   | Effect                 |                                                   | Certainty                                                                                         | Importance |
|---------------------------|-----------------------|---------------------------|--------------------------|--------------|---------------------------|----------------------|-------------------|-------------------|------------------------|---------------------------------------------------|---------------------------------------------------------------------------------------------------|------------|
| № of studies              | Study design          | Risk of bias              | Inconsistency            | Indirectness | Imprecision               | Other considerations | Colchicine        | Standard of care  | Relative (95% CI)      | Absolute (95% CI)                                 |                                                                                                   |            |
| Mortality                 |                       |                           |                          |              |                           |                      |                   |                   |                        |                                                   |                                                                                                   |            |
| 3                         | randomised trials     | very serious <sup>a</sup> | not serious <sup>b</sup> | not serious  | very serious <sup>c</sup> | none                 | 1174/5683 (20.7%) | 1194/5797 (20.6%) | RR 1.01 (0.86 to 1.17) | 2 more per 1,000 (from 29 fewer to 35 more)       | <br>VERY LOW   |            |
| Mortality                 |                       |                           |                          |              |                           |                      |                   |                   |                        |                                                   |                                                                                                   |            |
| 4                         | observational studies | very serious <sup>a</sup> | serious <sup>d</sup>     | not serious  | not serious               | none                 | 44/259 (17.0%)    | 146/322 (45.3%)   | RR 0.45 (0.26 to 0.78) | 249 fewer per 1,000 (from 336 fewer to 100 fewer) | <br>VERY LOW   |            |
| Length of hospitalization |                       |                           |                          |              |                           |                      |                   |                   |                        |                                                   |                                                                                                   |            |
| 2                         | randomised trials     | very serious <sup>a</sup> | not serious <sup>b</sup> | not serious  | very serious <sup>e</sup> | none                 | 73                | 67                | -                      | MD 2.25 days lower (9.34 lower to 4.84 higher)    | <br>VERY LOW |            |

CI: Confidence interval; RR: Risk ratio; MD: Mean difference

## Explanations

- a. There is a high risk of bias in at least one of the studies for this outcome.
- b. Low heterogeneity but not significantly effect
- c. No significant effect RR 1.01; 95%CI 0.86 to 1.17
- d. Moderate heterogeneity=22%
- e. No significant effect -2.25; 95%CI -9.34 to 4.84

Supplemental Figure S1: Risk of bias assessment of included trials.

| <u>Unique ID</u>      | <u>D1</u> | <u>D2</u>                                  | <u>D3</u> | <u>D4</u> | <u>D5</u> | <u>Overall</u> |
|-----------------------|-----------|--------------------------------------------|-----------|-----------|-----------|----------------|
| Deftereos et al. 2020 |           |                                            |           |           |           |                |
| Lopes et al. 2020     |           |                                            |           |           |           |                |
| Diaz, 2021            |           |                                            |           |           |           |                |
| Horby et al, 2021     |           |                                            |           |           |           |                |
| Absalon, 2021         |           |                                            |           |           |           |                |
|                       |           |                                            |           |           |           |                |
|                       |           | Low risk                                   |           |           |           |                |
|                       |           | Some concerns                              |           |           |           |                |
|                       |           | High risk                                  |           |           |           |                |
|                       | D1        | Randomisation process                      |           |           |           |                |
|                       | D2        | Deviations from the intended interventions |           |           |           |                |
|                       | D3        | Missing outcome data                       |           |           |           |                |
|                       | D4        | Measurement of the outcome                 |           |           |           |                |
|                       | D5        | Selection of the reported result           |           |           |           |                |

**Supplemental Figure S2:** Sensitivity analyses of the effects of colchicine vs standard of care on mortality.

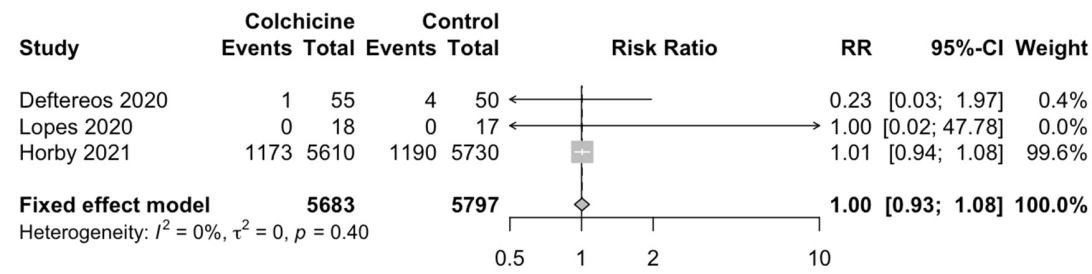

Supplement: s1 [file s1]
